# Supplementary material for: Genome-wide association mapping identifies yellow rust resistance loci in Ethiopian durum wheat germplasm
Source: PLoS One. 2021 May 17;16(5):e0243675. doi: 10.1371/journal.pone.0243675 (PMC8128278; doi:10.1371/journal.pone.0243675)
Supplement: S3 Table — (CSV) [file pone.0243675.s003.csv]

S3 Table. Genotypes consistently resistant acorss the four environments in terms of SEV, RES and CI
Reaction Data Class	No of Resistant genotypes across the 4 environments	Frequency of Resistant genotypes across the 4 environments	Percentage (%) Resistant genotypes across the 4 environments
SEV	109	0.372	37.20%
RES	76	0.259	25.90%
*CI	91	0.311	31.10%
Total	293	1	100.00%
* As CI is considered the combined representation of Reaction of the Genotypes to Pst, number of stably resistant genotypes across the four environments is 91.
